# Supplementary material for: Sedentary Behaviour and Physical Activity Levels during Second Period of Lockdown in Chilean’s Schoolchildren: How Bad Is It?
Source: MDPI journal article supplement (doi:10.3390/children10030481), 2023-03-01
Supplement: s1 [file s1]

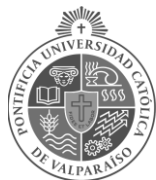

## CUESTIONARIO PADRES E HIJOS ACTIVOS Y SALUDABLES (EPAS/ EHAS)

### ASENTIMIENTO INFORMADO

**"Entorno familiar y escolar. Efectos de los niveles de actividad física de los padres sobre la actividad física de los niños".**

Somos un grupo de investigación formado por profesores de la Pontificia Universidad Católica de Valparaíso, Chile y la Universidad de Cádiz, España que trabajamos en actividad física y salud. Estamos realizando un estudio conforme a las necesidades educativas y de actividad física de nuestros escolares. Este estudio tiene como fin, indagar sobre el entorno **familiar y escolar**, y la asociación de los niveles de actividad física de los padres sobre la actividad física de sus hijos. La información obtenida, nos permitirá identificar factores fundamentales para mejorar métodos de enseñanza en prácticas físicas y aumentar los niveles de actividad física en la población infantil y juvenil. Para ello, necesitamos que los/as participantes contesten a este cuestionario. Al mismo tiempo necesitamos que uno de sus hijos en etapa escolar pueda contestar el **cuestionario de escolares** adjunto a esta solicitud.

**Usted debe saber que:**

- a. Su participación en este estudio es totalmente **voluntaria**.
- b. La participación o no participación no supondrá para usted **ningún riesgo**.
- c. **Todos los datos obtenidos en este estudio serán confidenciales** y se tratarán conforme establece la Ley Orgánica de Protección de Datos Personales y garantía de derechos digitales 3/2018 de España y la Ley N.º 19628 sobre Protección de la Vida Privada en Chile.
- d. La información obtenida únicamente se utilizará para los fines específicos de investigación.
- e. Para cualquier duda o consulta puede escribir al coordinador del estudio, profesor Fernando Rodríguez al mail **fernando.rodriguez@pucv.cl**.
- 6. Este estudio está patrocinado por la **Escuela de Educación Física** y financiado por la **Dirección de Investigación de la Pontificia Universidad Católica de Valparaíso**.

**¿Acepta participar en este estudio?**

---

NOMBRE Y APELLIDO

## INFORMACIÓN PERSONAL (HIJO/A)

1. Nombre y apellidos \_\_\_\_\_

**2. Fecha de nacimiento** \_\_/\_\_/\_\_

**3.Edad** \_\_\_\_\_

#### 4.Sexo

**Hombre**

11

**Mujer**

1

**5. Dirección en la cual resides (ciudad, calle, número, departamento, letra)** \_\_\_\_\_

**6.Nombre de tu establecimiento educacional** \_\_\_\_\_

### 7. ¿En qué curso vas?

8. ¿Tu familia posee algún automóvil, furgoneta o camioneta?

No ☐

Sí, uno ☐

Sí, dos o más ☐

9. ¿Tienes tu propia habitación?      Sí ☐

No ☐

**10. Durante los últimos 12 meses, ¿cuántas veces viajaste de vacaciones con tu familia?**

Ninguna ☐

Una ☐

Dos ☐

Más de dos ☐

**11. ¿Cuántos computadores tiene tu familia en casa?**

Ninguno ☐

Uno ☐

Dos ☐

Más de dos ☐

## MODO DE DESPLAZAMIENTO

**12. ¿Cuánta distancia te desplazas al colegio?**

[illegible]

13. ¿Cuánto tardas en llegar al colegio desde que sales de tu casa?

|                             | No me desplazo al colegio | Menos de 15 min          | Entre 15 a 30 min        | Desde 30 a 60 min        | Más de 60 min            |
|-----------------------------|---------------------------|--------------------------|--------------------------|--------------------------|--------------------------|
| <u>Antes</u> de la pandemia | <input type="checkbox"/>  | <input type="checkbox"/> | <input type="checkbox"/> | <input type="checkbox"/> | <input type="checkbox"/> |
| <u>Durante</u> la pandemia  | <input type="checkbox"/>  | <input type="checkbox"/> | <input type="checkbox"/> | <input type="checkbox"/> | <input type="checkbox"/> |

**14. ¿Cómo VAS habitualmente al colegio?**

[illegible]

### 15. ¿Cómo VUELVES del colegio a casa?

|                             | No me desplazo al colegio | Caminando                | Bicicleta                | Automóvil/colectivo/taxi/Uber | Moto                     | Autobús (micro)          | Tren/Metro               | Otra                     |
|-----------------------------|---------------------------|--------------------------|--------------------------|-------------------------------|--------------------------|--------------------------|--------------------------|--------------------------|
| <u>Antes de la pandemia</u> | <input type="checkbox"/>  | <input type="checkbox"/> | <input type="checkbox"/> | <input type="checkbox"/>      | <input type="checkbox"/> | <input type="checkbox"/> | <input type="checkbox"/> | <input type="checkbox"/> |
| <u>Durante la pandemia</u>  | <input type="checkbox"/>  | <input type="checkbox"/> | <input type="checkbox"/> | <input type="checkbox"/>      | <input type="checkbox"/> | <input type="checkbox"/> | <input type="checkbox"/> | <input type="checkbox"/> |

### 16. ¿Con quién VAS al colegio?

|                             | No me desplazo al colegio | Con mi padre             | Con mi madre             | Con mis amigos           | Con alguno de mis abuelos | Yo solo o sola           | Con vecinos              | Con mi hermano/a         |
|-----------------------------|---------------------------|--------------------------|--------------------------|--------------------------|---------------------------|--------------------------|--------------------------|--------------------------|
| <u>Antes de la pandemia</u> | <input type="checkbox"/>  | <input type="checkbox"/> | <input type="checkbox"/> | <input type="checkbox"/> | <input type="checkbox"/>  | <input type="checkbox"/> | <input type="checkbox"/> | <input type="checkbox"/> |
| <u>Durante la pandemia</u>  | <input type="checkbox"/>  | <input type="checkbox"/> | <input type="checkbox"/> | <input type="checkbox"/> | <input type="checkbox"/>  | <input type="checkbox"/> | <input type="checkbox"/> | <input type="checkbox"/> |

### 17. ¿Con quién VUELVES del colegio?

|                             | No me desplazo al colegio | Con mi padre             | Con mi madre             | Con mis amigos           | Con alguno de mis abuelos | Yo solo o sola           | Con vecinos              | Con mi hermano/a         |
|-----------------------------|---------------------------|--------------------------|--------------------------|--------------------------|---------------------------|--------------------------|--------------------------|--------------------------|
| <u>Antes de la pandemia</u> | <input type="checkbox"/>  | <input type="checkbox"/> | <input type="checkbox"/> | <input type="checkbox"/> | <input type="checkbox"/>  | <input type="checkbox"/> | <input type="checkbox"/> | <input type="checkbox"/> |
| <u>Durante la pandemia</u>  | <input type="checkbox"/>  | <input type="checkbox"/> | <input type="checkbox"/> | <input type="checkbox"/> | <input type="checkbox"/>  | <input type="checkbox"/> | <input type="checkbox"/> | <input type="checkbox"/> |

## PERFIL DE ACTIVIDAD FÍSICA EN JÓVENES (YAP)

### 18. ¿Cuántos días a la semana tienes clases de Educación Física?

|                                  | Cero días (nunca)        | Un día                   | Dos días                 | Tres días                | Cuatro días              | Cinco días               |
|----------------------------------|--------------------------|--------------------------|--------------------------|--------------------------|--------------------------|--------------------------|
| <u>Antes de la pandemia</u>      | <input type="checkbox"/> |
| <u>Ahora durante la pandemia</u> | <input type="checkbox"/> |

### 19. ¿Cuántos recreos tienes al día?

|                                  | Cero (ninguno)           | Un recreo                | Dos recreos              | Tres recreos             | Cuatro recreos           |
|----------------------------------|--------------------------|--------------------------|--------------------------|--------------------------|--------------------------|
| <u>Antes de la pandemia</u>      | <input type="checkbox"/> |
| <u>Ahora durante la pandemia</u> | <input type="checkbox"/> |

### 20. En general, ¿disfrutas realizar actividad física?

|                                  | Nada                     | Poco                     | Algo                     | Bastante                 | Mucho                    |
|----------------------------------|--------------------------|--------------------------|--------------------------|--------------------------|--------------------------|
| <u>Antes de la pandemia</u>      | <input type="checkbox"/> |
| <u>Ahora durante la pandemia</u> | <input type="checkbox"/> |

### 21. ¿Disfrutas en las clases de Educación Física?

|                                  | Nada                     | Poco                     | Algo                     | Bastante                 | Mucho                    |
|----------------------------------|--------------------------|--------------------------|--------------------------|--------------------------|--------------------------|
| <u>Antes de la pandemia</u>      | <input type="checkbox"/> |
| <u>Ahora durante la pandemia</u> | <input type="checkbox"/> |

## Ir al colegio

22. ¿Cuántos días FUISTE caminando o en bicicleta al colegio? (si no lo recuerdas con exactitud, intenta señalar la respuesta más adecuada)

[illegible]

### Actividad durante las clases de Educación Física

**23. Durante las clases de Educación Física, ¿con qué frecuencia estuviste corriendo y moviéndote en juegos o actividades organizadas por el profesor? (si no tuviste Educación Física, elige “no tuve Educación Física”)**

[illegible]

### Actividad durante los recreos

**24. Durante los recreos, ¿con qué frecuencia estuviste practicando deporte, caminando, corriendo o jugando de forma activa? (si no tuviste recreos, elige “no tuve recreos en el colegio”)**

[illegible]

### Actividad durante el descanso para comer

25. Durante el descanso para almorzar ¿con qué frecuencia estuviste moviéndote, caminando o jugando? (si no tienes descansos para comer en el colegio porque no hay clases por la tarde, elige “no tuve descanso para comer”)

[illegible]

## FUISTE del colegio

26. ¿Cuántos días volviste del colegio caminando o en bicicleta? (si no lo recuerdas con exactitud, intenta señalar la respuesta más adecuada)

[illegible]

## Volver del colegio

27. ¿Cuántos días volviste del colegio caminando o en bicicleta? (si no lo recuerdas con exactitud, intenta señalar la respuesta más adecuada)

[illegible]

Estas preguntas son sobre tu nivel de actividad física en distintos periodos (fuera del colegio). Responde pensando en la actividad física que has hecho fuera del colegio durante los últimos siete días.

### Actividad ANTES DEL COLEGIO

28. Antes de empezar el colegio (entre las 6:00 y las 8:00 de la mañana), ¿cuántos días hiciste actividad física durante al menos 10 minutos? (aquí se incluyen actividades realizadas en casa, colegio u otro lugar, pero NO incluye el ir caminando o en bicicleta al colegio)

|                                            | Cero días<br>(nunca)     | Un día                   | Dos días                 | Tres días                | Cuatro días              | Cinco días               |
|--------------------------------------------|--------------------------|--------------------------|--------------------------|--------------------------|--------------------------|--------------------------|
| <u>Antes de la</u><br><u>pandemia</u>      | <input type="checkbox"/> |
| <u>Ahora durante la</u><br><u>pandemia</u> | <input type="checkbox"/> |

### Actividad POR LAS TARDES

29. Por las tardes (entre las 18:00 y las 22:00), ¿cuántos días hiciste actividad física durante al menos 10 minutos? (se incluyen actividades como jugar con amigos/familia, deportes de equipo o clases en las que hagas actividad física (como danza, natación u otras), pero NO la vuelta del colegio caminando o en bicicleta)

|                                            | Cero días<br>(nunca)     | Un día                   | Dos días                 | Tres días                | Cuatro días              | Cinco días               |
|--------------------------------------------|--------------------------|--------------------------|--------------------------|--------------------------|--------------------------|--------------------------|
| <u>Antes de la</u><br><u>pandemia</u>      | <input type="checkbox"/> |
| <u>Ahora durante la</u><br><u>pandemia</u> | <input type="checkbox"/> |

### Actividad en FIN DE SEMANA (sábado y domingo).

30. ¿Cuánta actividad física hiciste el sábado pasado? (se incluye ejercicio físico, tareas de la casa, excursiones (paseos) con la familia, deportes, baile o juegos. Si no lo recuerdas con exactitud, intenta señalar la respuesta más adecuada)

|                                            | Nada de actividad<br>física (0 minutos) | Muy poca<br>actividad física (1-<br>30 minutos) | Una cantidad<br>media de<br>actividad física (31<br>– 59 minutos) | Mucha actividad<br>física (1-2 horas) | Una gran cantidad<br>de actividad física<br>(más de dos<br>horas) |
|--------------------------------------------|-----------------------------------------|-------------------------------------------------|-------------------------------------------------------------------|---------------------------------------|-------------------------------------------------------------------|
| <u>Antes de la</u><br><u>pandemia</u>      | <input type="checkbox"/>                | <input type="checkbox"/>                        | <input type="checkbox"/>                                          | <input type="checkbox"/>              | <input type="checkbox"/>                                          |
| <u>Ahora durante la</u><br><u>pandemia</u> | <input type="checkbox"/>                | <input type="checkbox"/>                        | <input type="checkbox"/>                                          | <input type="checkbox"/>              | <input type="checkbox"/>                                          |

### TIEMPO SEDENTARIO

Estas preguntas son sobre el tiempo que pasas descansando y sentado. Probablemente estés sentado mientras comes, haces las tareas (deberes) o tocas instrumentos musicales; pero también puedes estar sentado cuando ves la televisión, usas videojuegos, usas el computador (ordenador, portátil) el teléfono móvil (celular), tablets/iPad u otros. Responde a estas preguntas pensando en el tiempo que has pasado sin moverte durante estas actividades en los últimos sietedías (solo en los días de colegio)

### Tiempo viendo TELEVISIÓN

31. ¿Cuánto tiempo estuviste viendo la televisión fuera del colegio? (incluye el tiempo que estuviste viendo películas (dibujos animados) o deportes, pero NO jugando a videojuegos)

|                                            | No vi nada de<br>televisión | Vi la televisión<br>menos de 1 hora<br>al día | Vi la televisión<br>entre 1- 2 horas al<br>día | Vi la televisión<br>más de 2 horas y<br>hasta 3 horas al<br>día | Vi la televisión<br>más de 3 horas al<br>día |
|--------------------------------------------|-----------------------------|-----------------------------------------------|------------------------------------------------|-----------------------------------------------------------------|----------------------------------------------|
| <u>Antes de la</u><br><u>pandemia</u>      | <input type="checkbox"/>    | <input type="checkbox"/>                      | <input type="checkbox"/>                       | <input type="checkbox"/>                                        | <input type="checkbox"/>                     |
| <u>Ahora durante la</u><br><u>pandemia</u> | <input type="checkbox"/>    | <input type="checkbox"/>                      | <input type="checkbox"/>                       | <input type="checkbox"/>                                        | <input type="checkbox"/>                     |

## Tiempo con VIDEOJUEGOS

**32. ¿Cuánto tiempo estuviste jugando a videojuegos fuera del colegio? (incluye jugar a la Nintendo DS, Wii, Xbox, PlayStation, juegos en tu teléfono celular, tablets/iPad u otras consolas). NO incluir juegos con computador**

|                                  | No jugué nada con consolas | Jugué menos de 1 hora al día | Jugué entre 1-2 horas al día | Jugué más de 2 horas y hasta 3 horas al día | Jugué más de 3 horas al día |
|----------------------------------|----------------------------|------------------------------|------------------------------|---------------------------------------------|-----------------------------|
| <u>Antes de la pandemia</u>      | <input type="checkbox"/>   | <input type="checkbox"/>     | <input type="checkbox"/>     | <input type="checkbox"/>                    | <input type="checkbox"/>    |
| <u>Ahora durante la pandemia</u> | <input type="checkbox"/>   | <input type="checkbox"/>     | <input type="checkbox"/>     | <input type="checkbox"/>                    | <input type="checkbox"/>    |

## Tiempo con COMPUTADOR

**33. ¿Cuánto tiempo estuviste usando el computador fuera del colegio? (NO se incluye el uso para hacer tareas, pero SÍ el tiempo en Facebook, usando internet, chateando, jugando a videojuegos o juegos online)**

|                                  | No usé el computador para estas actividades | Usé el computador menos de 1 hora al día | Usé el computador entre 1 -2 horas al día | Usé el computador más de 2 horas y hasta 3 horas al día | Usé el computador más de 3 horas al día |
|----------------------------------|---------------------------------------------|------------------------------------------|-------------------------------------------|---------------------------------------------------------|-----------------------------------------|
| <u>Antes de la pandemia</u>      | <input type="checkbox"/>                    | <input type="checkbox"/>                 | <input type="checkbox"/>                  | <input type="checkbox"/>                                | <input type="checkbox"/>                |
| <u>Ahora durante la pandemia</u> | <input type="checkbox"/>                    | <input type="checkbox"/>                 | <input type="checkbox"/>                  | <input type="checkbox"/>                                | <input type="checkbox"/>                |

## Tiempo con TELÉFONO MÓVIL

**34. ¿Cuánto tiempo estuviste usando tu teléfono móvil (celular) fuera del colegio? (esto incluye el tiempo hablando por teléfono y escribiendo mensajes). Si no tienes teléfono y no usas nunca el de tus padres o algún amigo, elige la opción “no usé nunca el teléfono móvil”.**

|                                  | No usé el teléfono móvil | Usé el teléfono móvil menos de 1 hora al día | Usé el teléfono entre 1-2 horas al día | Usé el teléfono móvil más de 2 horas y hasta 3 horas al día | Usé el teléfono móvil más de 3 horas al día |
|----------------------------------|--------------------------|----------------------------------------------|----------------------------------------|-------------------------------------------------------------|---------------------------------------------|
| <u>Antes de la pandemia</u>      | <input type="checkbox"/> | <input type="checkbox"/>                     | <input type="checkbox"/>               | <input type="checkbox"/>                                    | <input type="checkbox"/>                    |
| <u>Ahora durante la pandemia</u> | <input type="checkbox"/> | <input type="checkbox"/>                     | <input type="checkbox"/>               | <input type="checkbox"/>                                    | <input type="checkbox"/>                    |

**35. Hábitos sedentarios en una semana normal (NO solo la última semana): ¿Cuál de las siguientes frases define mejor tus hábitos sedentarios en casa?**

|                                  | Apenas estoy sentado en mi tiempo libre | Estoy sentado durante poco tiempo en mi tiempo libre | Estoy sentado mucho tiempo en mi tiempo libre | Estoy sentado mucho tiempo en mi tiempo libre | Estoy sentado casi todo el tiempo en mi tiempo libre |
|----------------------------------|-----------------------------------------|------------------------------------------------------|-----------------------------------------------|-----------------------------------------------|------------------------------------------------------|
| <u>Antes de la pandemia</u>      | <input type="checkbox"/>                | <input type="checkbox"/>                             | <input type="checkbox"/>                      | <input type="checkbox"/>                      | <input type="checkbox"/>                             |
| <u>Ahora durante la pandemia</u> | <input type="checkbox"/>                | <input type="checkbox"/>                             | <input type="checkbox"/>                      | <input type="checkbox"/>                      | <input type="checkbox"/>                             |

## CUESTIONARIO DE AUTOEVALUACIÓN DE LA CONDICIÓN FÍSICA Y LA CALIDAD DE VIDA

Es muy importante que conteste a las siguientes preguntas usted solo, sin tener en cuenta las respuestas de otras personas. Sus respuestas solo son útiles para el progreso de la ciencia. Por favor, conteste todas las preguntas con sinceridad y no las deje en blanco. Y aún más importante, sea sincero. Gracias por su cooperación con la ciencia.

**Piense sobre su nivel de condición física (comparado con sus amigos/as) y elija la opción más adecuada para cada pregunta.**

### 36. Mi condición física general es:

|                                            | Muy mala                 | Mala                     | Aceptable                | Buena                    | Muy buena                |
|--------------------------------------------|--------------------------|--------------------------|--------------------------|--------------------------|--------------------------|
| <u>Antes de la</u><br><u>pandemia</u>      | <input type="checkbox"/> |
| <u>Ahora durante la</u><br><u>pandemia</u> | <input type="checkbox"/> |

### 37. Mi condición física cardio-respiratoria (capacidad para hacer ejercicio, por ejemplo, correr durante mucho tiempo) es:

|                                            | Muy mala                 | Mala                     | Aceptable                | Buena                    | Muy buena                |
|--------------------------------------------|--------------------------|--------------------------|--------------------------|--------------------------|--------------------------|
| <u>Antes de la</u><br><u>pandemia</u>      | <input type="checkbox"/> |
| <u>Ahora durante la</u><br><u>pandemia</u> | <input type="checkbox"/> |

### 38. Mi fuerza muscular es:

|                                            | Muy mala                 | Mala                     | Aceptable                | Buena                    | Muy buena                |
|--------------------------------------------|--------------------------|--------------------------|--------------------------|--------------------------|--------------------------|
| <u>Antes de la</u><br><u>pandemia</u>      | <input type="checkbox"/> |
| <u>Ahora durante la</u><br><u>pandemia</u> | <input type="checkbox"/> |

### 39. Mi velocidad/agilidad es:

|                                            | Muy mala                 | Mala                     | Aceptable                | Buena                    | Muy buena                |
|--------------------------------------------|--------------------------|--------------------------|--------------------------|--------------------------|--------------------------|
| <u>Antes de la</u><br><u>pandemia</u>      | <input type="checkbox"/> |
| <u>Ahora durante la</u><br><u>pandemia</u> | <input type="checkbox"/> |

### 40. Mi flexibilidad es:

|                                            | Muy mala                 | Mala                     | Aceptable                | Buena                    | Muy buena                |
|--------------------------------------------|--------------------------|--------------------------|--------------------------|--------------------------|--------------------------|
| <u>Antes de la</u><br><u>pandemia</u>      | <input type="checkbox"/> |
| <u>Ahora durante la</u><br><u>pandemia</u> | <input type="checkbox"/> |

## COMPORTAMIENTO DE SUEÑO

### 41. ¿A qué hora sueles irte a la cama los días de semana (lunes a viernes, en formato 24 horas)?

a. Antes de la Pandemia

| Hora                 | min                  | A.m/p.m              |
|----------------------|----------------------|----------------------|
| <input type="text"/> | <input type="text"/> | <input type="text"/> |

b. Ahora durante de la Pandemia

| Hora                 | min                  | A.m/p.m              |
|----------------------|----------------------|----------------------|
| <input type="text"/> | <input type="text"/> | <input type="text"/> |

### 42. ¿A qué hora sueles irte a la cama los días de fin de semana (sábado y domingo)?

a. Antes de la Pandemia

| Hora                 | min                  | A.m/p.m              |
|----------------------|----------------------|----------------------|
| <input type="text"/> | <input type="text"/> | <input type="text"/> |

b. Ahora durante de la Pandemia

| Hora                 | min                  | A.m/p.m              |
|----------------------|----------------------|----------------------|
| <input type="text"/> | <input type="text"/> | <input type="text"/> |

### 43. ¿A qué hora sueles levantarte los días de semana (lunes a viernes)?

a. Antes de la Pandemia

| Hora                 | min                  | A.m/p.m              |
|----------------------|----------------------|----------------------|
| <input type="text"/> | <input type="text"/> | <input type="text"/> |

b. Ahora durante de la Pandemia

| Hora                 | min                  | A.m/p.m              |
|----------------------|----------------------|----------------------|
| <input type="text"/> | <input type="text"/> | <input type="text"/> |

### 44. ¿A qué hora sueles levantarte los días de fin de semana (sábado y domingo)?

a. Antes de la Pandemia

| Hora                 | min                  | A.m/p.m              |
|----------------------|----------------------|----------------------|
| <input type="text"/> | <input type="text"/> | <input type="text"/> |

b. Ahora durante de la Pandemia

| Hora | min | A.m/p.m |
|------|-----|---------|
|      |     |         |

## CUESTIONARIO DE HÁBITOS ALIMENTARIOS

Por favor responda las siguientes preguntas relacionadas con tus hábitos alimenticios.

45. ¿Desayunas habitualmente?                      Sí    ☐                      No    ☐

46. Si tu respuesta fue sí en la pregunta anterior, describe brevemente qué desayunas habitualmente.

---

47. ¿Consumes alimentos no saludables? (Alto en calorías o azúcar o grasa, por ejemplo: papas fritas, chocolates, pasteles, etc.)

|                                  | Nunca                    | A veces                  | La mayor parte del tiempo | Siempre                  |
|----------------------------------|--------------------------|--------------------------|---------------------------|--------------------------|
| <u>Antes de la pandemia</u>      | <input type="checkbox"/> | <input type="checkbox"/> | <input type="checkbox"/>  | <input type="checkbox"/> |
| <u>Ahora durante la pandemia</u> | <input type="checkbox"/> | <input type="checkbox"/> | <input type="checkbox"/>  | <input type="checkbox"/> |

48. ¿Con que frecuencia consideras que comes fuera de control?

|                                  | Nunca                    | A veces                  | La mayor parte del tiempo | Siempre                  |
|----------------------------------|--------------------------|--------------------------|---------------------------|--------------------------|
| <u>Antes de la pandemia</u>      | <input type="checkbox"/> | <input type="checkbox"/> | <input type="checkbox"/>  | <input type="checkbox"/> |
| <u>Ahora durante la pandemia</u> | <input type="checkbox"/> | <input type="checkbox"/> | <input type="checkbox"/>  | <input type="checkbox"/> |

49. ¿Con que frecuencia comes alimentos fuera de tus comidas?

|                                  | Nunca                    | A veces                  | La mayor parte del tiempo | Siempre                  |
|----------------------------------|--------------------------|--------------------------|---------------------------|--------------------------|
| <u>Antes de la pandemia</u>      | <input type="checkbox"/> | <input type="checkbox"/> | <input type="checkbox"/>  | <input type="checkbox"/> |
| <u>Ahora durante la pandemia</u> | <input type="checkbox"/> | <input type="checkbox"/> | <input type="checkbox"/>  | <input type="checkbox"/> |

50. ¿Cuántas comidas realizas en el día? (Desayuno, almuerzo, Once/cena, colación).

|                                  | 1-2 comidas al día       | 3-4 comidas al día       | 5-6 comidas al día       | Más de 6 comidas al día  |
|----------------------------------|--------------------------|--------------------------|--------------------------|--------------------------|
| <u>Antes de la pandemia</u>      | <input type="checkbox"/> | <input type="checkbox"/> | <input type="checkbox"/> | <input type="checkbox"/> |
| <u>Ahora durante la pandemia</u> | <input type="checkbox"/> | <input type="checkbox"/> | <input type="checkbox"/> | <input type="checkbox"/> |

51. ¿Tiene alguna sugerencia/observación sobre el cuestionario? ¡Cuéntenosla!

EL CUESTIONARIO HA TERMINADO. MUCHAS GRACIAS POR TU PARTICIPACIÓN, NOS AYUDARÁ A CONOCER MÁS SOBRE LA IMPORTANCIA DE LA ACTIVIDAD FÍSICA.
